# Supplementary material
Source: Springer Nature journal article supplement (https://www.springermedizin.de/resource/supplementary/12967_2014_1845_MOESM2_ESM.pdf/9574970)

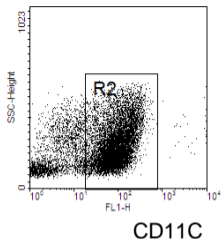

CD11C+

siscrambled

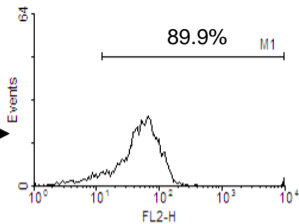

siCD40

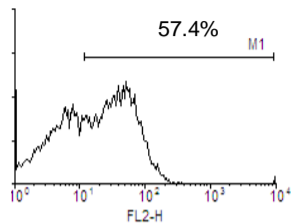

CD40

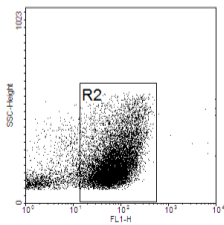

CD11C+

siscrambled

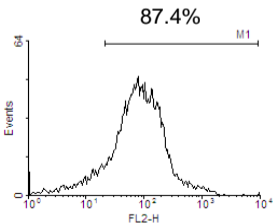

siCD80

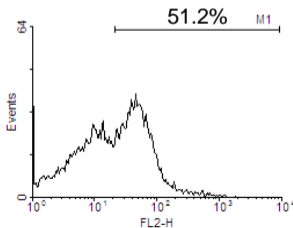

CD80

Supplement: MOESM2 [file 9574970]
